# Supplementary material for: A Role for Malignant Brain Tumor Domain-Containing Protein 1 in Human Endometrial Stromal Cell Decidualization
Source: Front Cell Dev Biol. 2020 Aug 11;8:745. doi: 10.3389/fcell.2020.00745 (PMC7432280; doi:10.3389/fcell.2020.00745)
Supplement: Supplementary file 1 [file Data_Sheet_1.pdf]

**Supplementary Material for**

**A Role for Malignant Brain Tumor Domain-containing protein 1 in Human Endometrial  
Stromal Cell Decidualization.**

Sangappa B. Chadchan, Vineet K. Maurya, Gwendalyn L. Krekeler, Emily S. Jungheim, and  
Ramakrishna Kommagani\*

**This PDF file includes  
Supplementary Figures 1-3.  
Supplementary Table 1.**

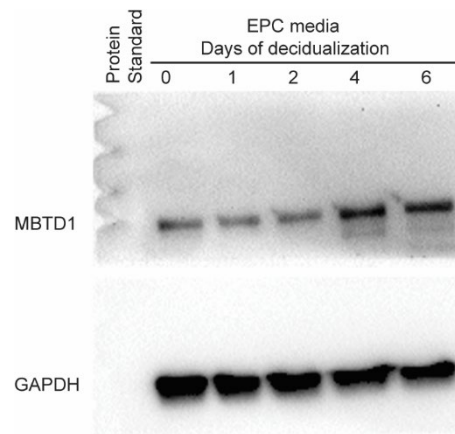

**Supplementary Figure 1: MBTD1 level in human endometrial stromal cells during decidualization.**

Original Western blot of MBTD1 and GAPDH as shown in Figure 3B.

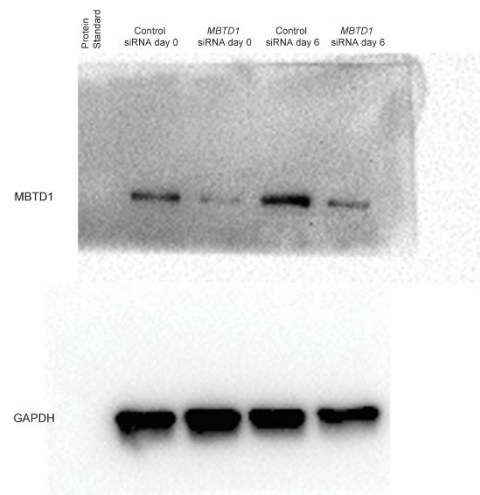

**Supplementary Figure 2: MBTD1 knockdown confirmation.**

Original Western blot of MBTD1 and GAPDH as shown in Figure 4D.

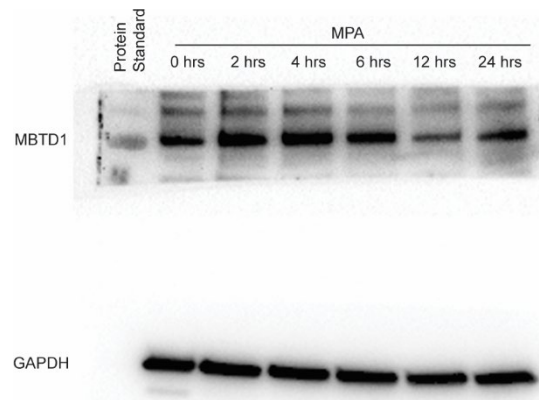

**Supplementary Figure 3: Level of MBTD1 in human endometrial stromal cells during MPA treatment.**

Original Western blot of MBTD1 and GAPDH as shown in Figure 7B.

**Supplementary Table 1. List of TaqMan probes**

| <b>Gene name</b> | <b>Species</b> | <b>Application, Chemistry</b> | <b>Company</b> | <b>Cat. No.</b> |
|------------------|----------------|-------------------------------|----------------|-----------------|
| <i>MBTD1</i>     | Human          | qPCR, Taqman                  | ABI            | Hs00908844 ml   |
| <i>PRL</i>       | Human          | qPCR, Taqman                  | ABI            | Hs00168730 ml   |
| <i>IGFBP1</i>    | Human          | qPCR, Taqman                  | ABI            | Hs00236877 ml   |
| <i>PGR</i>       | Human          | qPCR, Taqman                  | ABI            | Hs01556702 ml   |
| <i>WNT4</i>      | Human          | qPCR, Taqman                  | ABI            | Hs01573505 ml   |
| <i>GREB1</i>     | Human          | qPCR, Taqman                  | ABI            | Hs00536409 ml   |
| <i>FOXO1A</i>    | Human          | qPCR, Taqman                  | ABI            | Hs00231106 ml   |
| <i>Mbtd1</i>     | Mouse          | qPCR, Taqman                  | ABI            | Mm00506113 ml   |
| <i>Areg</i>      | Mouse          | qPCR, Taqman                  | ABI            | Mm01354339 ml   |
| <i>Ihh</i>       | Mouse          | qPCR, Taqman                  | ABI            | Mm00439613 ml   |
| <i>Il13ra2</i>   | Mouse          | qPCR, Taqman                  | ABI            | Mm00515166 ml   |
| <i>18S</i>       | Human<br>Mouse | qPCR, Taqman                  | ABI            | 4318839         |

ABI-applied biosystems.
